# Supplementary material
Source: publisher figshare collection journal article supplement (https://acs.figshare.com/ndownloader/files/17380040)
Supplement: Supplementary file 1 [file 17380040]

### Neuronal proteins as targets of 3-hydroxykynurenine: Implications in neurodegenerative diseases

Andrea Capucciati,<sup>a</sup> Monica Galliano,<sup>b</sup> Luigi Bubacco,<sup>c</sup> Luigi Zecca,<sup>d</sup> Luigi Casella,<sup>a</sup> Enrico Monzani,<sup>a\*</sup> Stefania Nicolis<sup>a\*</sup>

<sup>a</sup> Department of Chemistry, University of Pavia, 27100 Pavia, Italy

<sup>b</sup> Department of Molecular Medicine, University of Pavia, 27100 Pavia, Italy

<sup>c</sup> Department of Biology, University of Padova, 35121 Padova, Italy

<sup>d</sup> Institute of Biomedical Technologies, National Research Council of Italy, 20090 Segrate (Milano), Italy

|                                                                                                                                                                                                                                                                                                                                                                                                     |         |
|-----------------------------------------------------------------------------------------------------------------------------------------------------------------------------------------------------------------------------------------------------------------------------------------------------------------------------------------------------------------------------------------------------|---------|
| <b>Table S1.</b> Residues of $\alpha$ Syn, A $\beta$ <sub>16</sub> , and A $\beta$ <sub>28</sub> , identified by LC-MS/MS in the conjugates 3OHKyn-Cu-A $\beta$ <sub>16</sub> , 3OHKyn-Fe-A $\beta$ <sub>16</sub> , 3OHKyn-Cu-A $\beta$ <sub>28</sub> , 3OHKyn-Fe-A $\beta$ <sub>28</sub> , 3OHKyn-Cu- $\alpha$ Syn, and 3OHKyn-Fe- $\alpha$ Syn, as adducts with 3OHKyn and its oxidation products | pag S2  |
| <b>Figure S1.</b> MS/MS spectrum of the A $\beta$ <sub>16</sub> adduct with 3OHKyn at His13                                                                                                                                                                                                                                                                                                         | pag S3  |
| <b>Figure S2.</b> MS/MS spectrum of the A $\beta$ <sub>28</sub> adducts with OHXan at His13 and 3OHKyn at His14                                                                                                                                                                                                                                                                                     | pag S4  |
| <b>Figure S3.</b> MS/MS spectrum of the $\alpha$ Syn adducts with 3OHKyn at Lys6 and Xan at Lys10                                                                                                                                                                                                                                                                                                   | pag S5  |
| <b>Figure S4.</b> MS/MS spectrum of A $\beta$ <sub>16</sub> oxidized at His13                                                                                                                                                                                                                                                                                                                       | pag S6  |
| <b>Figure S5.</b> Derivative absorption spectrum of 3OHKyn                                                                                                                                                                                                                                                                                                                                          | pag S7  |
| <b>Figure S6.</b> Derivative absorption spectrum of oxidized 3OHKyn                                                                                                                                                                                                                                                                                                                                 | pag S7  |
| <b>Figure S7.</b> Derivative absorption spectrum of 3OHKyn- $\alpha$ Syn                                                                                                                                                                                                                                                                                                                            | pag S7  |
| <b>Figure S8.</b> Absorption spectra of oxidized 3OHKyn, 3OHKyn-A $\beta$ <sub>16</sub> and A $\beta$ <sub>16</sub>                                                                                                                                                                                                                                                                                 | pag S8  |
| <b>Figure S9.</b> Absorption spectra of oxidized 3OHKyn, 3OHKyn- $\alpha$ Syn <sub>6</sub> and $\alpha$ Syn <sub>6</sub>                                                                                                                                                                                                                                                                            | pag S8  |
| <b>Figure S10.</b> Absorption spectra of oxidized 3OHKyn, 3OHKyn- $\alpha$ Syn <sub>15</sub> and $\alpha$ Syn <sub>15</sub>                                                                                                                                                                                                                                                                         | pag S8  |
| <b>Figure S11.</b> Proton NMR spectra of A $\beta$ <sub>16</sub> and 3OHKyn-A $\beta$ <sub>16</sub>                                                                                                                                                                                                                                                                                                 | pag S9  |
| <b>Figure S12.</b> Proton NMR spectra of $\alpha$ Syn <sub>6</sub> and 3OHKyn- $\alpha$ Syn <sub>6</sub>                                                                                                                                                                                                                                                                                            | pag S9  |
| <b>Figure S13.</b> Proton NMR spectra of $\alpha$ Syn <sub>15</sub> and 3OHKyn- $\alpha$ Syn <sub>15</sub>                                                                                                                                                                                                                                                                                          | pag S10 |

**Table S1.** Residues of  $\alpha$ Syn, A $\beta$ <sub>16</sub>, and A $\beta$ <sub>28</sub>, identified by LC-MS/MS in the conjugates 3OHKyn-Cu-A $\beta$ <sub>16</sub>, 3OHKyn-Fe-A $\beta$ <sub>16</sub>, 3OHKyn-Cu-A $\beta$ <sub>28</sub>, 3OHKyn-Fe-A $\beta$ <sub>28</sub>, 3OHKyn-Cu- $\alpha$ Syn, and 3OHKyn-Fe- $\alpha$ Syn, as adducts with 3OHKyn (+207), Xan (+406), HXan (+408), and OHXan (+422) corresponding to the nucleophilic attack of Lys/His side chains to the unsaturated ketone obtained upon deamination of the amino acid side chain of the kynurenine derivative, with Xan (+423), and DHQCA (+235) corresponding to the nucleophilic attack of His/Lys side chains to the quinones, and as oxidized by oxygen addition (+16).

| Conjugates                        | 3OHKyn-<br>-aa<br>(+207) | Xan-<br>aa(A)<br>(+406) | HXan-aa<br>(+408) | OHXan-<br>aa<br>(+422) | Xan-<br>aa(B)<br>(+423) | DHQCA-<br>aa<br>(+235) | oxidation<br>(+16) |
|-----------------------------------|--------------------------|-------------------------|-------------------|------------------------|-------------------------|------------------------|--------------------|
| 3OHKyn-Cu-A $\beta$ <sub>16</sub> |                          | H13                     | H6 H13<br>H14     | H13                    | H14                     |                        | H13 Y10            |
| 3OHKyn-Fe-A $\beta$ <sub>16</sub> |                          | H13                     | H6 H13<br>H14     | H13                    | H14                     |                        | H13 Y10            |
| 3OHKyn-Cu-A $\beta$ <sub>28</sub> |                          | H13                     | H6 H13<br>H14     | H13 H14                | H14                     |                        | H13 Y10            |
| 3OHKyn-Fe-A $\beta$ <sub>28</sub> |                          | H13                     | H6 H13<br>H14     | H13 H14                | H14                     |                        | H13 Y10            |
| 3OHKyn-Cu- $\alpha$ Syn           | K21 K23                  | K21 K23<br>K45          |                   | K23                    |                         | K23                    | M116<br>M127       |
| 3OHKyn-Fe- $\alpha$ Syn           | K21 K23                  | K21 K23<br>K45          |                   | K23                    |                         | K23                    | M116<br>M127       |

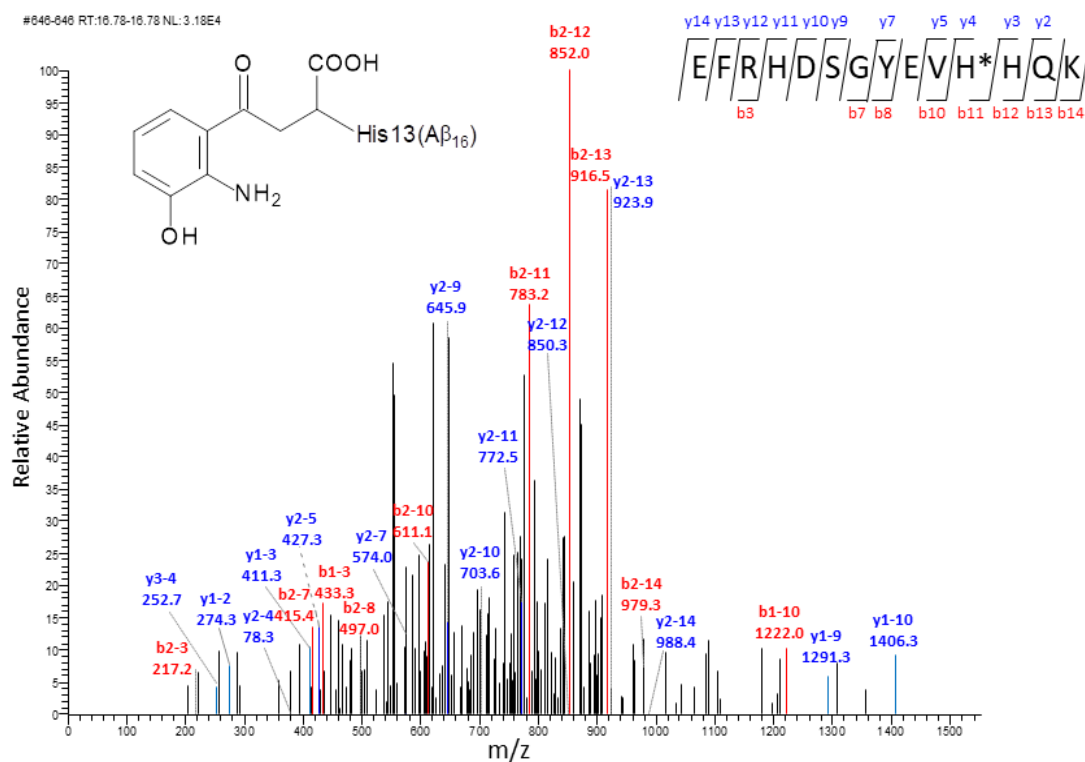

**Figure S1.** MS/MS spectrum of the  $m/z$  659.7 peak assigned to the 3-16 peptide of A $\beta_{16}$  in a triple-charged state containing the adduct with 3OHKyn at His13 (peptide mass of 1975.8 amu, corresponding to a mass increase of 207 amu with respect to the unmodified peptide). The assignment of the y (in blue) and b (in red) ion series, in mono-, double-, or triple-charged states, is shown. Above the spectrum, the sequence of the peptide is shown with an asterisk on the modified residue and with the summary of the y and b ions found in the spectrum.

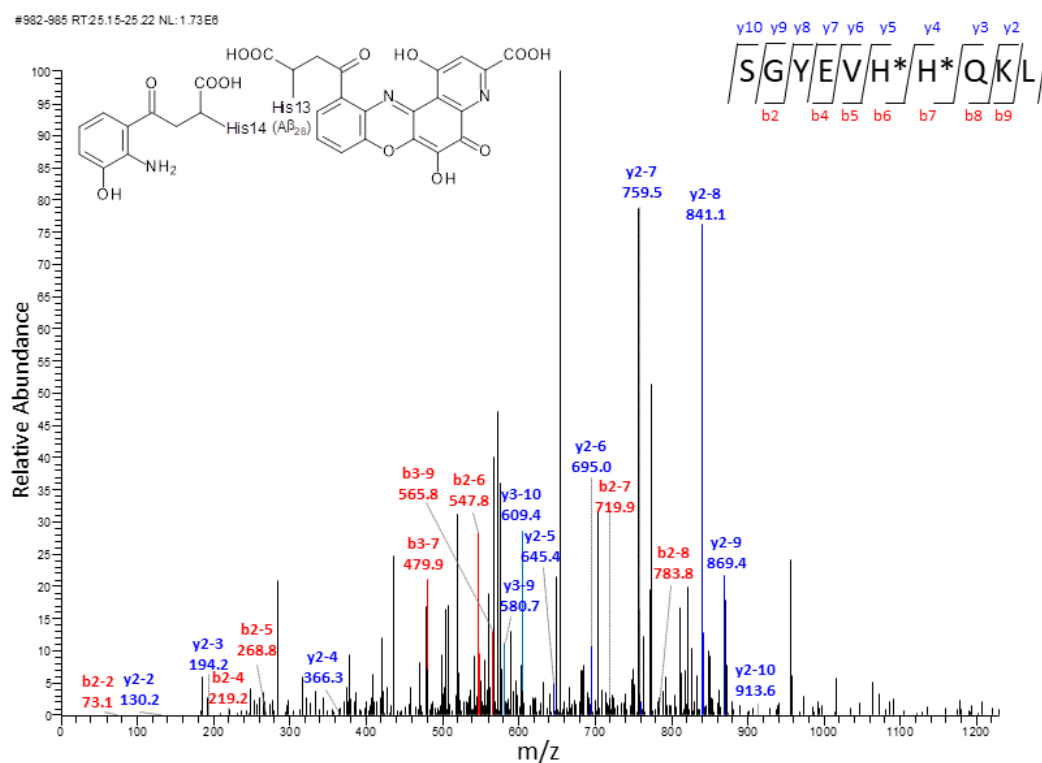

**Figure S2.** MS/MS spectrum of the m/z 610.0 peak assigned to the 8-17 peptide of A $\beta$ <sub>28</sub> in a triple-charged state containing the adducts with OHXan at His13 and 3OHKyn at His14 (peptide mass of 1826.3 amu, corresponding to a mass increase of (422+207) amu with respect to the unmodified peptide). The assignment of the y (in blue) and b (in red) ion series, in double- or triple-charged states, is shown. Above the spectrum, the sequence of the peptide is shown with an asterisk on each modified residue and with the summary of the y and b ions found in the spectrum.



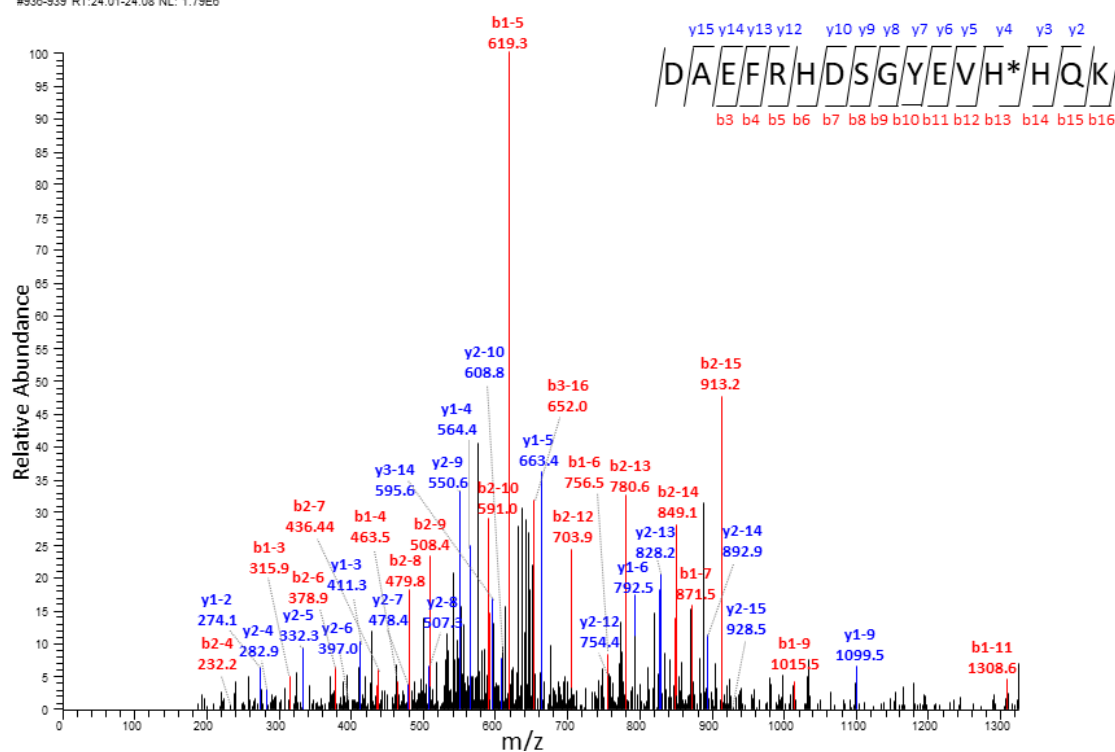

**Figure S4.** MS/MS spectrum of the m/z 657.3 peak assigned to the Aβ<sub>16</sub> peptide in a triple-charged state containing oxidized His13 (peptide mass of 1970.0 amu, corresponding to a mass increase of 16 amu with respect to the unmodified peptide). The assignment of the y (in blue) and b (in red) ion series, in mono-, double-, or triple-charged states, is shown. Above the spectrum, the sequence of the peptide is shown with an asterisk on the modified residue and with the summary of the y and b ions found in the spectrum.

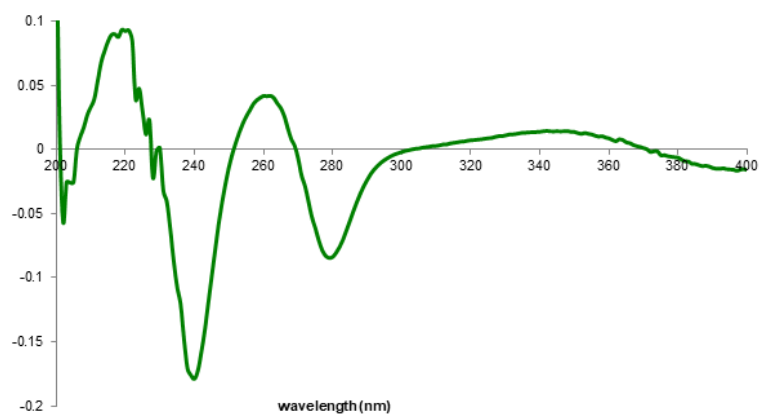

**Figure S5.** Derivative absorption spectrum of 3OHKyn.

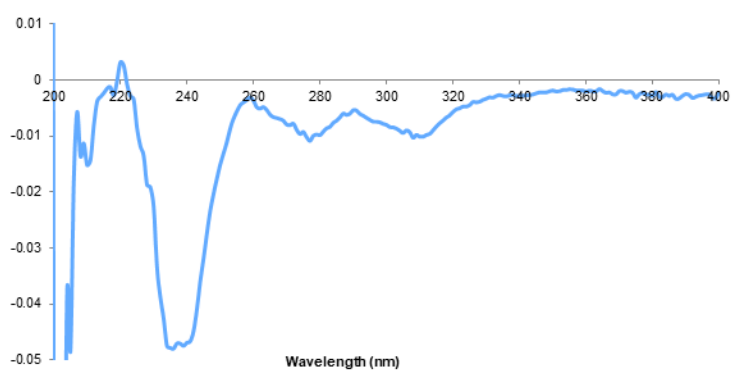

**Figure S6.** Derivative absorption spectrum of oxidized 3OHKyn.

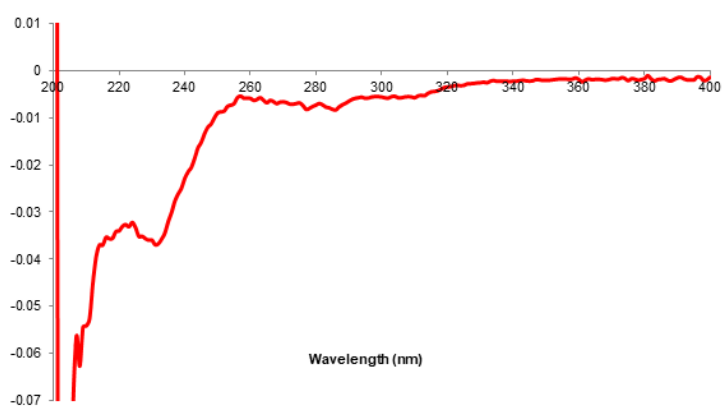

**Figure S7.** Derivative absorption spectrum of 3OHKyn- $\alpha$ Syn.

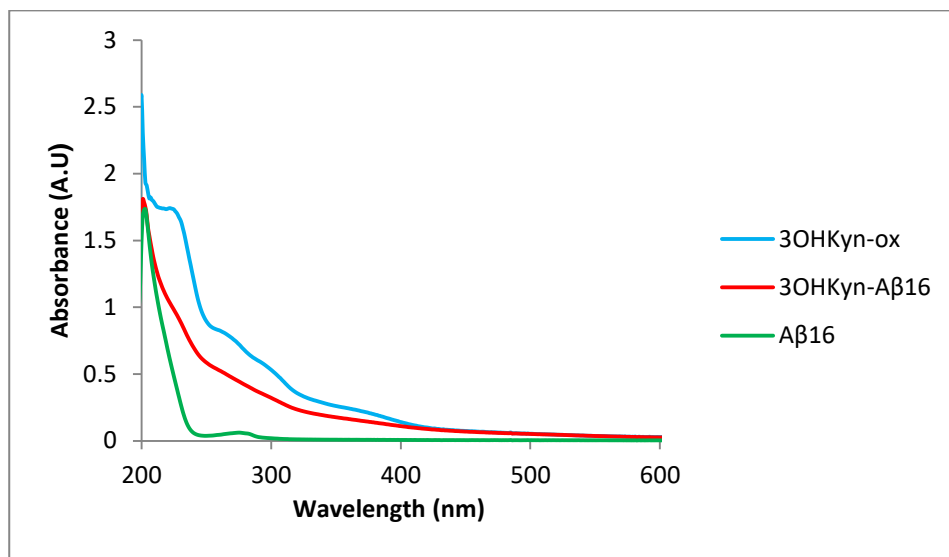

**Figure S8.** Absorption spectra of oxidized 3OHKyn, 3OHKyn-A $\beta$ <sub>16</sub> and A $\beta$ <sub>16</sub>.

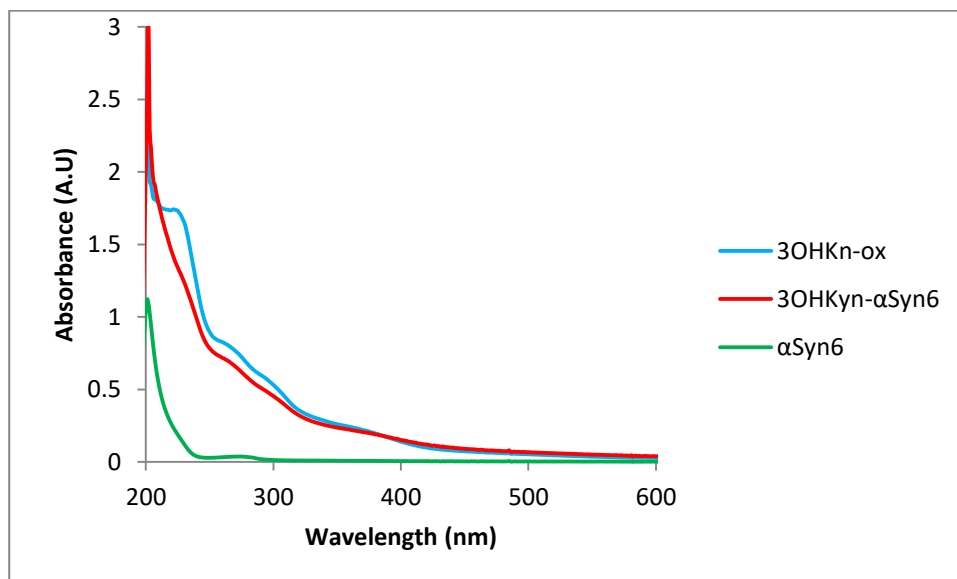

**Figure S9.** Absorption spectra of oxidized 3OHKyn, 3OHKyn- $\alpha$ Syn<sub>6</sub> and  $\alpha$ Syn<sub>6</sub>.

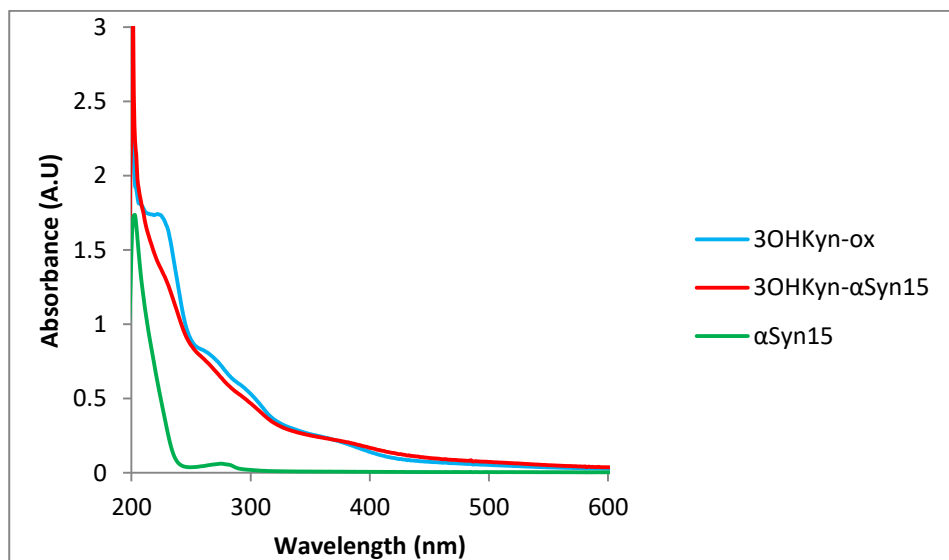

**Figure S10.** Absorption spectra of oxidized 3OHKyn, 3OHKyn- $\alpha$ Syn<sub>15</sub> and  $\alpha$ Syn<sub>15</sub>.

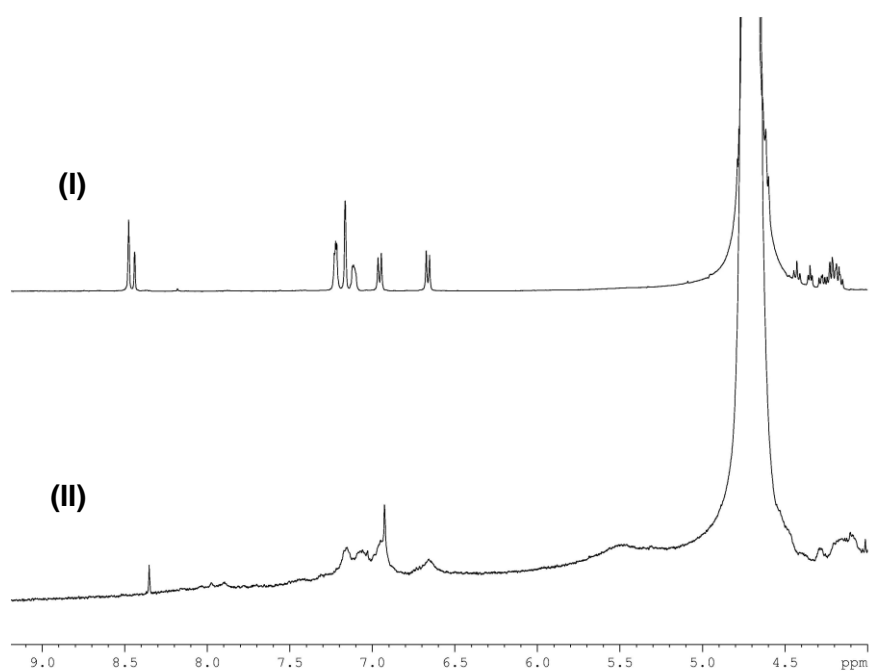

**Figure S11.** Proton NMR spectra of (I)  $A\beta_{16}$  and (II) 3OHKyn- $A\beta_{16}$ .

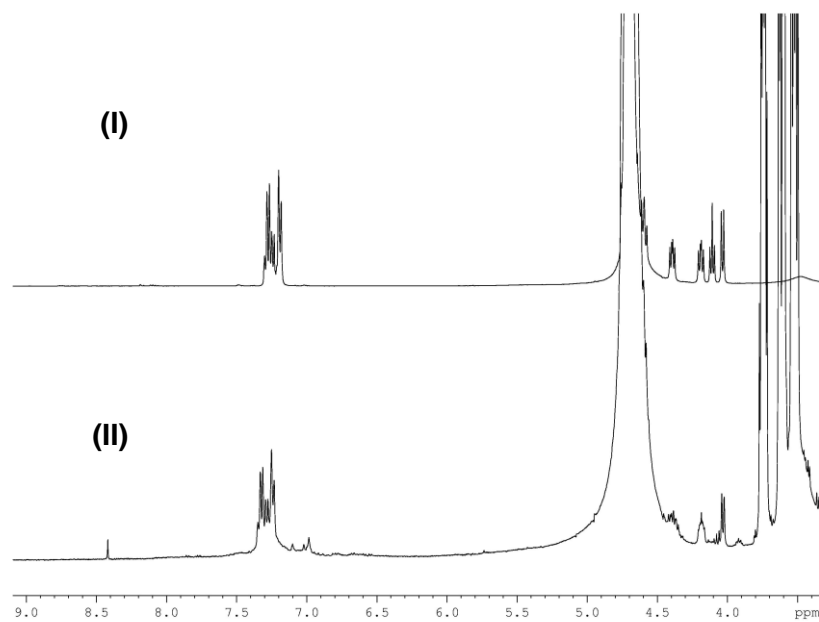

**Figure S12.** Proton NMR spectra of (I)  $\alpha\text{Syn}_6$  and (II) 3OHKyn- $\alpha\text{Syn}_6$ .

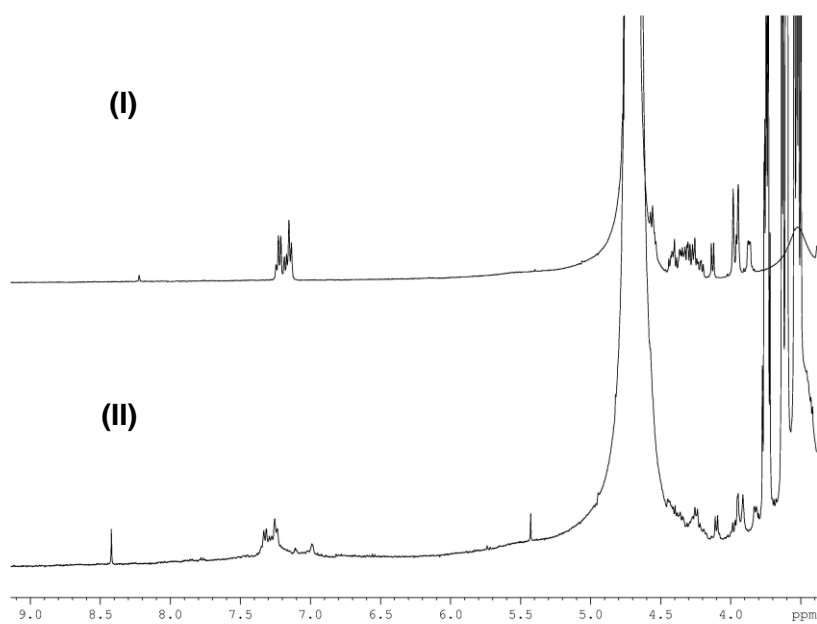

**Figure S13.** Proton NMR spectra of (I)  $\alpha$ Syn<sub>15</sub> and (II) 3OHKyn- $\alpha$ Syn<sub>15</sub>.
